# Supplementary material
Source: Royal Society of Chemistry journal article supplement (doi:10.1039/d6nj00561f)
Supplement: d6nj00561f1.pdf [file d6nj00561f1.pdf]

## Supporting Information

### **Dual-ligand engineering of Ti-Based MOFs for efficient piezo- photocatalytic overall water splitting**

**Xiao-Jie Jiang,<sup>a</sup> Yu-Tong Zhu,<sup>a</sup> Chao Li,<sup>d</sup> Guang-Yu Pan,<sup>a</sup> Mei-  
Ling Xu,<sup>\*ab</sup> Jian Jia,<sup>\*ab</sup> Xin Cheng,<sup>ab</sup> and Kui Li<sup>\*c</sup>**

<sup>a</sup> *School of Materials Science and Engineering, University of Jinan, Jinan, Shandong  
250022, China. Address here.*

<sup>b</sup> *Shandong Provincial Key Laboratory of Green and Intelligent Building Materials,  
University of Jinan, Jinan 250022, China.*

<sup>c</sup> *School of Chemistry and Chemical Engineering, Hainan University, Haikou 570228,  
Hainan, China.*

<sup>d</sup> *Heilongjiang Province Academy Of Cold Area Building Research*

## Supplemental Figures and Supplemental Tables

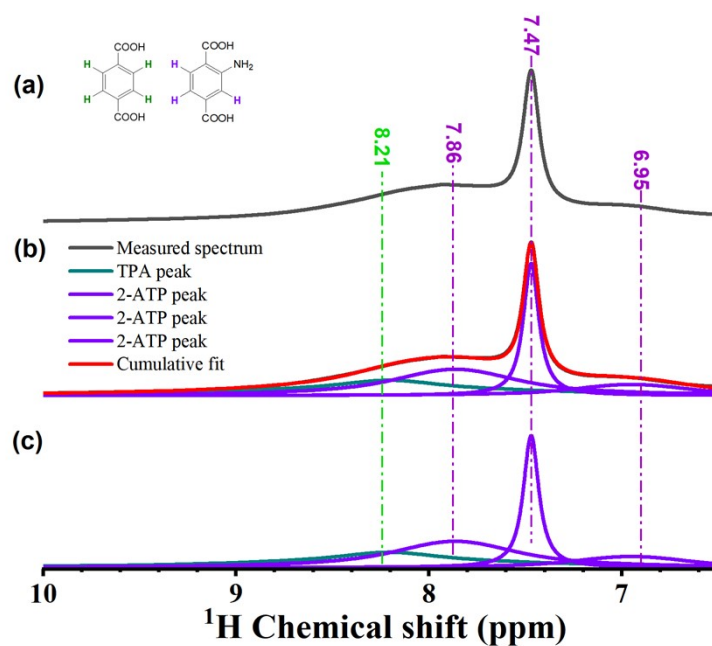

**Figure S1.** (a)  $^1\text{H}$  MAS NMR spectra of MOF measured, (b) fitted TPA, 2-ATP peaks and (c) cumulative fit, fitted TPA, 2-ATP peaks.

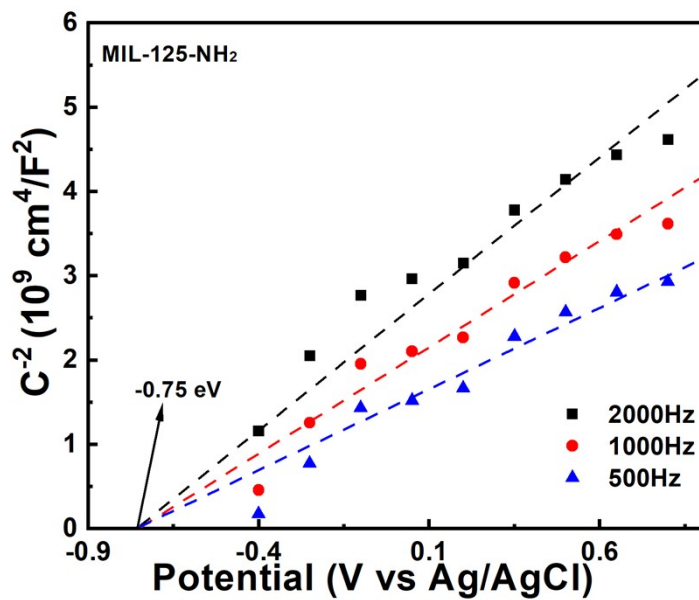

**Figure S2.** Mott-Schottky curves of MIL-125-NH<sub>2</sub>.

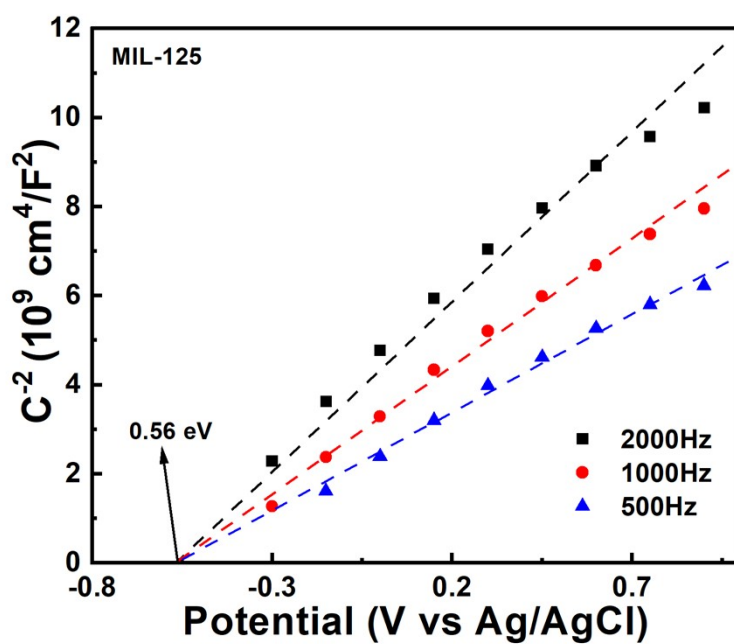

Figure S3. Mott-Schottky curves of MIL-125-NH<sub>2</sub>.

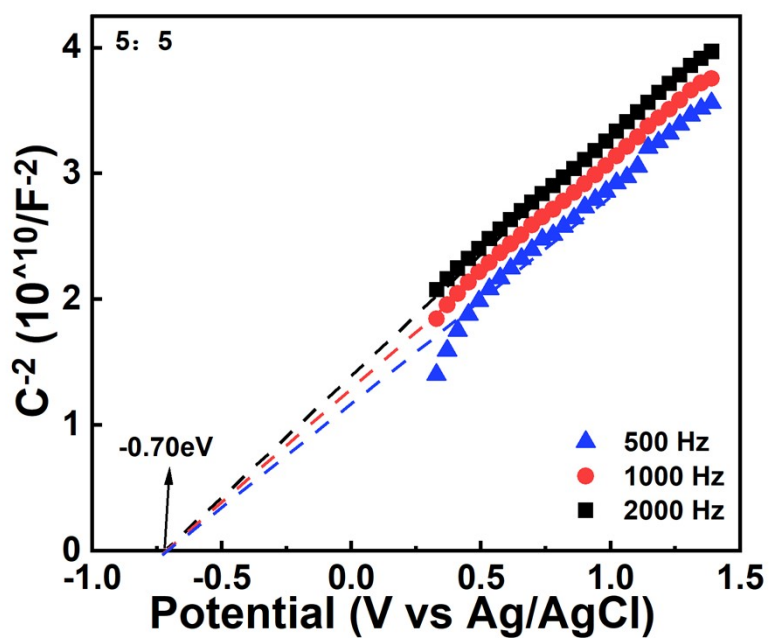

Figure S4. Mott-Schottky curves of MTV-MIL-125 (5:5).

**Table S1** Comparison of MOF catalytic overall water splitting rate.

| Photocatalyst                                            | Light source                                                                | Ultrasonic       | Cocatalyst                                       | HER<br>( $\mu\text{mol g}^{-1} \text{h}^{-1}$ ) | OER<br>( $\mu\text{mol g}^{-1} \text{h}^{-1}$ ) | References                                         |
|----------------------------------------------------------|-----------------------------------------------------------------------------|------------------|--------------------------------------------------|-------------------------------------------------|-------------------------------------------------|----------------------------------------------------|
| MTV-MIL-125 (5:5)                                        | 300 W Xe lamp ( $\lambda > 420$ nm)                                         | 300 W,<br>45 KHz | N/A                                              | 358.2                                           | 178.4                                           | This work                                          |
| MIL-173(Zr/Ti)-40                                        | Xe-Hg lamp<br>150 W, 1.5 AM filter                                          | N/A              | N/A                                              | 381 in 22 h                                     | 145 in 22 h                                     | <i>J. Mater. Chem. A</i> , 2022, 10, 24938-24950   |
| UiO-66(Zr)-NH <sub>2</sub><br>@MIL-88B(Fe)               | 150 W Hg-Xe lamp<br>through an AM 1.5G<br>filter (320 mW/cm <sup>2</sup> )  | N/A              | N/A                                              | 690 in 3 h                                      | 279 in 3 h                                      | <i>ACS Nano</i> 2024, 18, 20201-20212              |
| Ti-MOF: IEF-11                                           | 150 W Xe-Hg<br>lamp, 1.5 AM filter                                          | N/A              | N/A                                              | 672 in 22 h                                     | 322 in 22 h                                     | <i>Adv. Mater.</i> 2021, 33 (52), 2106627          |
| UiO-66(Zr)-NH <sub>2</sub>                               | 150 W Hg-Xe<br>lamp through an AM<br>1.5G filter, 220<br>mW/cm <sup>2</sup> | N/A              | N/A                                              | 450 in 5 h                                      | 160 in 5 h                                      | <i>Nano Res.</i> 17, 4134-4150 (2024)              |
| UiO-66(Zr)-NH <sub>2</sub><br>@UiO-66(Ce)                | 150 W Hg-Xe<br>lamp through an AM<br>1.5G filter                            | N/A              | N/A                                              | 708 in 22 h                                     | 320 in 22 h                                     | <i>Energy Fuels</i> 2023, 37, 5457-5468            |
| MgIn <sub>2</sub> S <sub>4</sub> /UiO-66-NH <sub>2</sub> | 300 W Xe lamp ( $\lambda > 420$ nm)                                         | N/A              | N/A                                              | 24.69                                           | 12.93                                           | <i>Langmuir</i> 2023, 39, 7294-7306                |
| RuO <sub>x</sub> -MIL-125(Ti)-NH <sub>2</sub>            | 300 W Xe lamp (UV/Vis<br>light)                                             | N/A              | 0.23 wt%<br>RuO <sub>x</sub>                     | 3.33                                            | 1.67                                            | <i>Appl. Catal. B: Environ.</i> 2019, 254, 677-68. |
| UiO-66(Zr/Ce/Ti)                                         | 300 W Xe lamp<br>(UV light)                                                 | N/A              | N/A                                              | 9.58                                            | 4.58                                            | <i>Appl. Catal. B: Environ.</i> 2020, 278, 11934.  |
| Pt@NH <sub>2</sub> -UiO-66@MnO <sub>x</sub>              | 300 W Xe lamp ( $\lambda > 400$ nm)                                         | N/A              | 3.2 wt%<br>Pt<br><br>0.1 wt%<br>MnO <sub>x</sub> | 19.6                                            | 10.1                                            | <i>Adv. Mater.</i> 2020, 32, 2004747.              |
